# Supplementary material
Source: MDPI journal article supplement (https://www.mdpi.com/2073-8994/13/3/369)
Supplement: s1 [file s1]

## Sheet: Table S1
Table S1. Leaf measures of the five age groups of moso bamboo culms.
Age Group	Leaf Length (cm)	Leaf Width (cm)	Leaf Area (cm2)	Leaf Perimeter (cm)
2014	10.3345	1.25262	9.13859	20.9963
2014	12.5969	1.01664	9.83116	25.389
2014	13.2103	1.27698	12.3796	26.6976
2014	9.23115	0.835408	5.53766	18.6502
2014	7.00861	0.876473	4.06632	14.2883
2014	8.27568	0.670683	4.07516	16.689
2014	7.61258	0.66299	3.62176	15.3613
2014	7.87573	0.715479	3.96403	15.9121
2014	8.97655	0.740608	4.78943	18.106
2014	8.56239	0.830318	5.04644	17.2953
2014	9.93817	0.837547	5.85045	20.0088
2014	5.96148	0.971042	3.79408	12.2954
2014	7.26581	0.797299	4.02478	14.7503
2014	8.33158	0.756225	4.48553	16.8271
2014	10.4479	0.851648	6.46248	21.041
2014	8.93979	1.19141	7.34794	18.2024
2014	5.55935	0.695726	2.62415	11.3479
2014	5.43884	0.86984	3.20172	11.2473
2014	6.52479	1.03072	4.45507	13.4205
2014	9.80448	0.614421	3.81799	19.68
2014	5.57663	0.83852	3.13205	11.4178
2014	12.4903	1.29694	11.9489	25.3481
2014	7.33385	0.781187	3.9892	14.9053
2014	12.2793	1.23561	11.2149	24.8644
2014	11.2188	1.20815	9.64514	22.7665
2014	9.05624	0.977998	6.35088	18.3765
2014	7.21444	0.722254	3.56608	14.5867
2014	8.22049	0.657178	3.86852	16.6
2014	9.19847	0.894745	5.66001	18.6008
2014	8.60914	1.23212	7.47456	17.6609
2014	8.62966	1.03833	6.1274	17.5589
2014	9.93441	0.855408	6.02575	20.0677
2014	9.87095	0.692813	5.19201	19.8929
2014	10.1831	0.598569	4.06235	20.4343
2014	12.5799	1.02492	9.47685	25.3828
2014	8.16985	0.752643	4.37926	16.5111
2014	14.5078	1.21942	13.1961	29.2663
2014	9.07484	1.10031	7.04774	18.4477
2014	9.59448	0.906915	6.38392	19.4119
2014	9.64883	0.934383	6.33767	19.5074
2014	9.82088	1.0112	7.07292	19.8661
2014	10.1815	0.856886	6.30442	20.5294
2014	9.09323	0.868937	5.7212	18.4197
2014	9.62935	0.784599	5.32275	19.4153
2014	9.99087	0.971952	7.19151	20.2517
2014	5.53815	0.857476	3.13251	11.4407
2014	8.91134	1.02294	6.45972	18.1168
2014	11.1199	1.19136	9.56679	22.5636
2014	10.2862	0.853215	6.1268	20.7224
2014	8.16205	0.723807	4.23904	16.4934
2014	10.3038	0.87757	6.59548	20.7711
2014	11.5649	1.32803	11.0191	23.4725
2014	6.07385	0.80597	3.30903	12.372
2014	10.4646	0.956432	7.05887	21.1395
2014	5.61291	0.884347	3.36904	11.5978
2014	8.79052	0.789183	4.89984	17.7859
2014	9.38333	0.804739	5.45475	18.9378
2014	6.14661	0.933052	3.79272	12.601
2014	9.23781	0.757507	4.99049	18.634
2014	8.17553	0.878069	4.90205	16.5536
2014	6.08977	0.984147	4.04237	12.5507
2014	9.37529	0.807023	5.4761	18.9303
2014	9.21856	0.853301	5.47849	18.6408
2014	7.92178	0.741317	4.13757	16.025
2014	8.70883	1.07052	6.56587	17.7669
2014	6.01117	1.02655	4.14607	12.4232
2014	6.62084	0.982396	4.33339	13.5909
2014	5.58229	0.936139	3.45856	11.4999
2014	6.02763	0.806183	3.27726	12.3164
2014	8.13796	0.994377	5.5521	16.5803
2014	10.4411	0.983384	7.35227	21.1405
2014	8.61045	1.09919	6.52368	17.5144
2014	8.38477	0.690372	4.09303	16.892
2014	5.97781	0.85944	3.36342	12.2491
2014	6.15927	1.09852	4.39536	12.7617
2014	7.61109	0.744445	4.05978	15.417
2014	7.94628	0.65722	3.45241	16.0185
2014	8.56889	0.841345	5.13422	17.3662
2014	8.75699	0.825641	5.0153	17.729
2014	6.28486	0.823363	3.5699	12.8367
2014	9.29997	1.19801	7.97623	19.0027
2014	5.69755	0.813529	3.1621	11.6952
2014	6.31601	0.654716	2.9489	12.8488
2014	8.04131	0.71896	4.10167	16.2591
2014	10.1129	1.06286	7.6217	20.4637
2014	12.7295	1.27775	12.0445	25.7129
2014	10.8684	1.53025	11.5054	22.2043
2014	10.475	1.08362	8.24766	21.2359
2014	9.93529	1.23008	8.93791	20.2735
2014	6.69772	0.847809	3.87168	13.6553
2014	7.52294	0.796499	4.15024	15.2856
2014	10.8512	1.22165	9.51896	22.0118
2014	7.72552	0.951897	5.13272	15.7238
2014	6.48661	1.03473	4.44813	13.3555
2014	5.517	0.764483	2.80254	11.3021
2014	4.4397	0.821019	2.42581	9.33247
2014	6.77535	1.13619	5.22391	13.9731
2014	7.93883	0.931116	5.1128	16.1306
2014	9.31241	0.913939	6.13125	18.8324
2014	8.81458	0.785094	4.76752	17.7881
2014	9.43265	0.980501	6.4329	19.1047
2014	9.6841	0.798058	5.61403	19.4804
2014	7.8225	1.11691	6.05051	16.0682
2014	10.6504	1.43041	10.7722	21.7811
2014	7.91257	0.698805	3.91139	15.9685
2014	6.97676	1.01256	4.75406	14.227
2014	10.7559	1.03045	8.14078	21.7398
2014	7.97931	0.885461	4.97356	16.1978
2014	9.29447	1.08829	7.08218	18.8619
2014	5.94269	0.803637	3.25408	12.1229
2014	5.42614	0.775606	2.82498	11.1218
2014	6.57823	0.801638	3.67829	13.4088
2014	9.53379	1.10169	7.63038	19.3726
2014	7.86025	0.935997	5.29353	16.0132
2014	11.3996	1.0472	8.5687	23.0124
2014	8.71636	1.02468	6.25201	17.7165
2014	7.70852	1.14336	5.949	15.7602
2014	9.48259	1.06767	7.00416	19.1923
2014	10.0753	0.992047	7.4209	20.3965
2014	9.485	0.925632	6.11881	19.1266
2014	7.613	0.835869	4.4972	15.4235
2014	10.5145	0.956892	7.33992	21.2379
2014	10.0668	1.06683	7.64597	20.3893
2014	9.80652	1.02637	7.02555	19.8218
2014	10.9072	0.895004	7.01845	21.9817
2014	8.18574	1.13582	6.22722	16.6975
2014	7.26638	1.04938	5.01967	14.8295
2014	11.6839	1.09155	9.34338	23.6301
2014	9.92006	0.945134	6.72869	20.1019
2014	10.8616	1.07953	8.65468	21.9933
2014	9.66633	0.971699	6.77501	19.5664
2014	11.7107	1.28377	10.7995	23.7021
2014	8.5348	1.12106	6.66197	17.4566
2014	6.7476	1.0738	4.86991	13.8526
2014	7.60077	0.825722	4.40219	15.4197
2014	8.56977	1.04235	5.97416	17.4054
2014	11.4926	1.4581	12.0097	23.4225
2014	8.20506	1.22289	6.8689	16.8007
2014	8.41948	0.759022	4.42258	17.0227
2014	8.70911	0.778431	4.63762	17.5883
2014	9.08016	1.06636	6.72181	18.4294
2014	7.60177	1.10894	5.68908	15.57
2014	11.0068	0.743401	5.91852	22.107
2014	9.75482	1.19228	8.1307	19.8614
2014	10.6288	1.26318	9.87572	21.6937
2014	10.2891	0.9173	6.75663	20.7299
2014	7.7907	0.690616	3.79826	15.7111
2014	7.51134	0.636569	3.41156	15.1663
2014	5.41208	0.77394	2.84958	11.1189
2014	6.13376	0.891462	3.5091	12.6206
2014	9.39406	0.8596	5.73512	18.9611
2014	6.64628	0.547695	2.53874	13.4111
2014	10.4315	0.681866	5.0274	20.9184
2014	7.993	0.918632	5.07493	16.2078
2014	8.86648	0.69307	4.33117	17.8553
2014	7.15545	0.851158	4.19904	14.5545
2014	5.40127	0.751697	2.68794	11.0417
2014	5.17723	0.961532	3.1719	10.8
2014	5.78407	0.968745	3.69725	12.0015
2014	10.1829	1.07197	7.82707	20.598
2014	10.0782	1.13782	8.02815	20.4094
2014	10.4978	0.938588	7.14675	21.1642
2014	8.74641	0.723623	4.53643	17.6263
2014	8.36433	0.717348	4.18932	16.8661
2014	8.01835	0.672464	3.73282	16.2047
2014	8.91298	0.670911	4.33013	17.9639
2014	7.90259	0.781506	4.25932	16.0037
2014	6.6842	0.776391	3.63274	13.5953
2014	7.49725	0.925508	4.8328	15.2836
2014	6.19714	0.806811	3.61275	12.6863
2014	7.11863	0.861697	4.27798	14.4951
2014	7.98246	0.780226	4.35279	16.1517
2014	4.39196	0.784006	2.35664	9.16356
2014	9.38048	1.0115	6.58863	18.9632
2014	7.00404	1.20726	5.55425	14.4274
2014	8.94081	1.17566	7.17425	18.1781
2014	8.39192	0.747925	4.44575	16.9657
2014	6.56759	1.01179	4.47942	13.5125
2014	5.20171	0.851944	2.9312	10.7558
2014	8.01725	0.978132	5.32179	16.307
2014	7.7332	0.574985	3.20755	15.6015
2014	8.6898	0.737919	4.39684	17.5086
2014	8.57181	0.643608	3.79007	17.264
2014	6.28619	0.820761	3.4584	12.7928
2014	5.85174	0.787906	3.16634	11.9751
2014	6.57438	0.876104	3.86724	13.3937
2014	8.94089	0.818637	5.2165	18.044
2014	5.09022	0.965838	3.28258	10.6321
2014	11.6618	0.793799	6.87236	23.3653
2014	9.69687	0.844507	5.8866	19.5444
2014	10.2368	1.15341	8.37937	20.7942
2014	7.12849	0.969906	4.66294	14.5647
2014	10.923	0.977242	7.89299	22.0327
2014	8.32258	0.722241	4.39314	16.793
2014	8.73007	0.695471	4.50786	17.5896
2014	6.39721	0.780785	3.50448	13.0562
2014	8.89415	0.718937	4.6042	17.9136
2014	8.04126	0.868674	4.78351	16.2866
2014	11.9949	1.00531	8.8832	24.1986
2014	8.97099	0.795377	5.01906	18.0904
2014	9.66691	1.10024	7.31367	19.5612
2014	7.80449	0.942446	5.08125	15.8783
2014	6.94094	0.886308	4.23	14.1479
2014	8.38586	0.877772	5.27203	17.015
2014	7.33457	1.10882	5.46179	15.0535
2014	8.83261	1.30842	7.8524	18.0691
2014	8.99656	1.10972	6.95599	18.3172
2014	7.09433	0.893835	4.37428	14.4439
2014	10.466	0.886687	6.65238	21.0839
2014	7.71889	1.13149	5.66033	16.0994
2014	7.43807	0.940606	4.85232	15.1807
2014	10.8537	1.04051	8.26035	21.9286
2014	7.00397	1.12035	5.23412	14.3992
2014	6.59105	0.79184	3.66055	13.4244
2014	7.9955	0.769028	4.3175	16.1558
2014	11.0932	0.828874	6.55635	22.2868
2014	7.19539	0.962211	4.72117	14.6504
2014	10.3073	0.835164	6.25878	20.772
2014	7.32568	0.822509	4.16041	14.8991
2014	7.35275	0.949278	4.75339	14.9874
2014	10.1698	0.778727	5.78492	20.4767
2014	8.62617	0.962661	5.83239	17.5038
2014	8.52981	1.15026	6.79101	17.4434
2014	9.09546	0.770653	5.0248	18.3145
2014	10.0585	1.15095	8.07243	20.4031
2014	6.33953	0.946316	3.86561	12.9772
2014	9.48301	0.91519	6.33134	19.1984
2014	8.81111	0.881581	5.43114	17.8161
2014	9.87561	0.72446	5.25378	19.8869
2014	6.79353	0.933698	4.28908	13.9198
2014	7.00129	0.922621	4.47154	14.3012
2014	7.84322	0.883463	4.74143	15.9193
2014	8.62067	0.818456	5.06087	17.4572
2014	7.87576	0.922438	5.04985	15.9978
2014	9.77411	0.779654	5.56714	19.6769
2014	8.75701	0.917415	5.61142	17.7473
2014	8.60066	0.717628	4.47663	17.3285
2014	7.85381	0.884515	4.83834	15.9437
2014	9.15183	0.896094	5.76464	18.4999
2014	9.64888	0.80838	5.68465	19.4441
2014	8.72213	0.713896	4.39035	17.5677
2014	7.71029	0.891832	4.87064	15.6647
2014	9.04612	1.01891	6.27377	18.3644
2014	8.86453	0.761347	4.87111	17.8859
2014	9.69043	1.07524	7.25767	19.6451
2014	7.8593	1.2454	6.4213	16.1578
2014	8.06495	0.708311	4.07688	16.2904
2014	6.23382	0.929598	3.75856	12.759
2014	9.70311	0.646119	4.50019	19.5218
2014	7.23444	0.950948	4.75816	14.7831
2014	7.86694	1.01454	5.38482	16.0382
2014	9.02223	0.916224	5.83547	18.2497
2014	6.73313	1.09797	4.92063	14.0958
2014	10.3629	1.00086	7.4563	20.9201
2014	8.97244	0.845117	5.41485	18.1307
2014	7.61866	0.754518	4.02708	15.414
2014	5.19284	0.940862	3.15005	10.8024
2014	9.33262	0.730674	4.93876	18.8063
2014	8.42048	0.750599	4.40407	16.9916
2014	9.0619	0.850334	5.56569	18.3644
2014	7.50245	0.776182	4.08215	15.2011
2014	7.31365	1.04308	5.14046	14.9509
2014	7.26239	0.723624	3.6365	14.6755
2014	7.69876	0.679968	3.66428	15.5626
2015	8.20332	0.641684	3.75848	16.4805
2015	5.05486	0.790783	2.6623	10.3911
2015	5.06875	0.938575	2.95874	10.5145
2015	7.05921	0.637101	3.18184	14.2988
2015	8.01712	0.774957	4.29076	16.1952
2015	8.59882	0.797195	4.72818	17.3623
2015	9.74656	0.89241	5.92285	19.6531
2015	6.3623	0.637802	2.82565	12.8736
2015	7.21493	0.610825	3.07751	14.5559
2015	7.71179	0.70659	3.9005	15.5853
2015	6.17085	0.828211	3.43293	12.5719
2015	8.35343	0.646802	3.84484	16.7565
2015	7.2325	0.871836	4.22243	14.6625
2015	6.62712	1.02721	4.49235	13.5933
2015	5.5346	0.926025	3.32382	11.4099
2015	7.71652	0.798884	4.41185	15.624
2015	6.64976	0.995336	4.44185	13.6573
2015	9.08218	0.768385	4.83993	18.299
2015	9.63475	0.93822	6.24359	19.4594
2015	5.39705	0.888653	3.05951	11.1182
2015	9.27592	0.87078	5.70214	18.6947
2015	6.11011	0.644281	2.77719	12.383
2015	6.72208	0.647269	3.17054	13.6099
2015	7.33916	0.656284	3.33206	14.8172
2015	7.4262	0.808306	4.2665	15.0556
2015	8.48511	0.72832	4.24635	17.116
2015	7.94482	0.754096	4.17653	16.0216
2015	8.81368	0.886221	5.65821	17.8451
2015	5.6815	0.839814	3.05943	11.6607
2015	6.34136	0.969493	4.23084	13.0129
2015	7.59969	0.687722	3.65239	15.3422
2015	6.94079	0.744752	3.5365	14.0655
2015	9.3662	1.03637	6.81133	18.9702
2015	8.4922	0.699513	4.04737	17.1163
2015	7.38374	0.918494	4.60982	15.0172
2015	7.73807	0.775834	4.23457	15.6552
2015	6.68162	0.662281	2.92102	13.5311
2015	6.96726	0.772532	3.76299	14.1131
2015	8.67032	0.827944	5.08426	17.5483
2015	8.7116	0.936671	5.68447	17.5989
2015	8.38427	0.732853	4.2004	16.8997
2015	8.27027	0.771141	4.50654	16.7012
2015	7.31765	0.589758	3.03644	14.729
2015	9.07986	0.800016	4.96388	18.292
2015	9.20713	0.925293	5.86826	18.5955
2015	8.63326	0.826655	5.02468	17.435
2015	8.24001	0.746579	4.28539	16.6603
2015	7.97484	0.623502	3.41713	16.0568
2015	7.09382	0.821915	3.89417	14.3559
2015	7.70911	0.773959	4.25523	15.5941
2015	7.21558	0.595926	2.91737	14.5538
2015	7.30754	0.635992	3.40156	14.7628
2015	6.24818	0.897056	3.77878	12.7846
2015	6.3535	0.751918	3.23056	12.8992
2015	7.59707	0.630792	3.24424	15.301
2015	7.97405	0.70489	3.97586	16.0874
2015	8.20369	0.727567	4.17253	16.5587
2015	7.36715	0.674028	3.51617	14.8942
2015	6.70649	0.527895	2.46068	13.5293
2015	7.03339	0.715716	3.51252	14.2301
2015	6.34759	0.982757	4.18455	13.0436
2015	7.39966	0.795046	4.2111	15.0087
2015	9.41926	0.797383	4.93021	18.9588
2015	8.45523	0.730722	4.26963	17.0592
2015	7.03215	0.994716	4.7002	14.343
2015	8.03993	0.698135	4.12068	16.2429
2015	4.81068	0.733932	2.2871	9.89875
2015	8.79053	0.757103	4.48945	17.762
2015	6.66883	0.689407	3.25576	13.5126
2015	8.26679	0.75819	4.47814	16.7051
2015	8.39317	0.611579	3.58313	16.8395
2015	7.33554	0.645471	3.41736	14.8203
2015	8.69819	0.801172	4.79825	17.5502
2015	7.97369	0.629968	3.49493	16.0574
2015	8.01241	0.650066	3.78301	16.1295
2015	8.92434	0.856655	5.39336	18.0243
2015	7.62616	0.697945	3.81655	15.4029
2015	6.92843	0.907013	4.09748	14.0999
2015	7.70939	0.74209	4.02571	15.5705
2015	6.76669	0.748279	3.53568	13.728
2015	8.80736	0.828149	5.27311	17.8214
2015	8.61318	0.670304	4.09711	17.3156
2015	5.01855	0.860801	2.88906	10.3749
2015	8.40904	0.62088	3.65688	16.9231
2015	8.00048	0.76319	4.29161	16.1579
2015	6.33882	0.887417	3.76156	12.9256
2015	6.07649	0.77755	3.12859	12.3765
2015	5.53575	0.886792	3.24341	11.3965
2015	4.85465	0.862455	2.52439	10.0714
2015	6.41527	0.675503	3.01964	13.0113
2015	5.64154	0.856611	3.21573	11.6085
2015	9.14502	0.763937	5.00444	18.3807
2015	8.00764	0.636899	3.61433	16.136
2015	8.16687	0.76061	4.41394	16.5443
2015	8.09211	0.680059	3.89121	16.3301
2015	6.68231	1.05694	4.69033	13.7283
2015	7.60367	0.841104	4.46195	15.4354
2015	7.88413	0.600597	3.25795	15.8758
2015	7.70619	0.766279	4.17636	15.602
2015	7.99312	0.653148	3.64909	16.0972
2015	6.58695	0.593595	2.81165	13.3141
2015	7.76567	0.808064	4.43488	15.7299
2015	7.58818	0.602062	3.322	15.2923
2015	8.6034	1.01795	6.00614	17.4941
2015	7.25794	0.994121	4.80949	14.7363
2015	6.86911	0.636088	3.08381	13.9045
2015	6.89361	0.799928	3.90906	13.9995
2015	5.75549	0.78471	2.97244	11.7464
2015	5.78896	0.88053	3.39464	11.8587
2015	8.04046	0.78968	4.5016	16.2604
2015	7.62363	0.810679	4.29518	15.4709
2015	8.87649	0.757988	4.77733	17.869
2015	7.93107	0.718246	4.04597	16.0174
2015	9.19317	0.805727	5.3939	18.5255
2015	7.69005	0.605007	3.35905	15.527
2015	6.61429	0.720149	3.37961	13.4367
2015	6.52809	1.03066	4.41611	13.3996
2015	7.21835	0.9241	4.37541	14.6461
2015	7.12813	0.972423	4.71162	14.5281
2015	5.19407	0.842595	2.91253	10.7249
2015	7.20973	0.798878	4.142	14.6319
2015	7.5548	1.00965	5.19197	15.3692
2015	6.45724	0.831314	3.59581	13.1452
2015	8.34147	0.795089	4.54635	16.8216
2015	8.42899	0.844415	5.084	17.038
2015	6.15337	0.966737	3.945	12.6426
2015	7.52215	0.652784	3.49167	15.187
2015	8.60762	0.75005	4.64015	17.3759
2015	7.36078	0.837903	4.24349	14.9358
2015	5.82101	0.827525	3.2365	11.9025
2015	7.40939	0.604029	3.115	14.9427
2015	8.15088	0.835195	4.80863	16.5004
2015	8.31982	0.697037	3.99878	16.7731
2015	7.59334	0.608749	3.10466	15.2658
2015	7.57163	0.822655	4.34	15.3278
2015	6.49723	0.939044	4.10586	13.2897
2015	6.85544	1.00788	4.59365	14.037
2015	6.64844	0.688268	3.16866	13.467
2015	4.8326	0.72911	2.28773	9.94247
2015	8.63133	0.668898	4.11067	17.3817
2015	7.31054	0.964156	4.83872	14.8557
2015	5.97862	0.865005	3.45335	12.2158
2015	7.82597	0.681107	3.73705	15.7559
2015	7.82468	0.750002	4.134	15.8278
2015	6.22432	0.924083	3.73226	12.7476
2015	6.64359	0.575726	2.62496	13.4168
2015	6.14002	0.593511	2.53599	12.438
2015	8.35259	0.629424	3.77859	16.8152
2015	6.12215	0.607221	2.5858	12.4094
2015	4.58721	0.643377	1.90788	9.3737
2015	8.60212	0.827808	5.03304	17.3861
2015	7.9407	0.676526	3.63344	16.0265
2015	7.77942	0.624421	3.30793	15.6655
2015	7.7794	0.700789	3.84345	15.6944
2015	4.5039	0.761719	2.38312	9.32946
2015	5.96918	0.895194	3.47988	12.255
2015	6.38272	0.838804	3.58095	12.9924
2015	6.0426	0.754072	3.04348	12.2826
2015	6.37877	0.894542	3.78934	13.0123
2015	7.61577	0.721892	3.93425	15.4154
2015	5.67133	0.853465	3.20152	11.6357
2015	7.55905	0.741304	3.94515	15.2803
2015	7.64089	0.917598	4.71842	15.4735
2015	7.42449	0.600202	3.08975	14.9834
2015	9.4882	0.882735	5.95156	19.1304
2015	7.801	0.638002	3.46671	15.7337
2015	7.0403	0.833449	3.97881	14.2488
2015	9.0636	0.875922	5.6239	18.2923
2015	7.08262	0.628256	3.15717	14.2826
2015	7.97834	0.653327	3.78476	16.0573
2015	7.35035	0.759733	3.9301	14.8715
2015	9.11667	0.762196	4.92701	18.3641
2015	8.2908	0.98916	5.77759	16.8921
2015	7.94859	0.679981	3.78494	16.0051
2015	8.47065	0.922419	5.27759	17.2053
2015	9.51836	1.02799	6.81259	19.2668
2015	8.88698	0.752816	4.72499	17.8913
2015	6.93375	0.844421	4.0117	14.0994
2015	5.30942	0.742399	2.63729	10.8717
2015	6.97558	1.03693	4.70016	14.2833
2015	6.33635	0.647413	2.83354	12.8562
2015	9.29053	0.800103	5.25597	18.7126
2015	7.99667	0.705173	3.99842	16.1419
2015	8.17393	0.714	4.11411	16.4969
2015	7.21708	0.683585	3.46911	14.619
2015	6.59053	0.835004	3.7094	13.4021
2015	7.13325	0.658017	3.26372	14.4173
2015	7.42654	0.785726	4.21442	15.0304
2015	9.08476	0.859959	5.56273	18.3556
2015	9.00107	0.758274	4.81621	18.1422
2015	4.25708	0.732839	2.02843	8.82123
2015	4.6032	0.761021	2.32259	9.51448
2015	6.19785	0.590843	2.554	12.555
2015	7.39809	0.583917	3.08198	14.9051
2015	6.79872	0.85671	4.02303	13.8129
2015	6.88324	0.561068	2.61995	13.8851
2015	6.12702	0.890775	3.66843	12.5884
2015	7.0422	0.695285	3.40973	14.2448
2015	4.88223	0.606455	1.9958	9.97451
2015	4.95497	0.768996	2.52148	10.187
2015	7.24507	0.703979	3.51996	14.666
2015	7.42558	0.745277	3.84956	15.0285
2015	4.14913	0.630206	1.70947	8.55346
2015	8.40564	0.75527	4.46657	16.9741
2015	7.04602	0.788035	3.92057	14.2862
2015	6.88345	0.565976	2.71558	13.8762
2015	9.62313	0.901365	6.00833	19.412
2015	7.24736	0.677908	3.42535	14.6262
2015	7.96855	0.642865	3.67561	16.0525
2015	7.43233	0.726152	3.76397	15.0687
2015	9.03495	0.891533	5.60671	18.2456
2015	9.09635	0.827016	5.39147	18.3223
2015	8.00738	0.727555	4.1858	16.1837
2015	6.64851	0.66603	3.15019	13.464
2015	7.06454	0.59797	3.01487	14.2839
2015	5.26107	0.842298	2.87563	10.823
2015	4.68672	0.806753	2.47747	9.68615
2015	6.03758	0.676545	2.84529	12.2524
2015	6.65219	0.839805	3.76037	13.5275
2015	8.01611	0.767625	4.41531	16.1975
2015	7.63221	0.560019	3.08836	15.3839
2015	4.68806	0.742242	2.28363	9.64402
2015	7.43832	0.693482	3.79786	15.0337
2015	8.5189	0.711677	4.18914	17.1382
2015	4.61999	0.71753	2.16422	9.46769
2015	6.93138	0.756677	3.63261	14.0251
2015	8.58971	0.704157	4.43259	17.3473
2015	7.07929	0.704697	3.52917	14.3429
2015	5.89531	0.879751	3.43134	12.093
2015	7.25673	0.55473	2.80158	14.6142
2015	6.58422	0.847938	3.79263	13.4105
2015	7.4753	0.616449	3.27996	15.0806
2015	9.43288	0.816233	5.5517	18.9955
2015	9.13453	0.891796	5.79043	18.4291
2015	8.6205	0.756824	4.66606	17.4228
2015	8.98912	0.684259	4.36049	18.1033
2015	6.17072	0.555086	2.22571	12.4625
2015	4.52086	0.703711	2.07694	9.32572
2015	5.71568	0.560708	2.23807	11.5861
2015	6.85796	0.738009	3.46707	13.8761
2015	8.0258	0.699203	3.84563	16.196
2015	7.12374	0.697147	3.4702	14.3881
2015	6.97024	0.853781	4.10217	14.1671
2015	6.08111	0.746932	3.12037	12.3963
2015	6.28698	0.799898	3.37643	12.7761
2015	6.9926	0.611037	2.76876	14.1052
2015	4.61361	0.794455	2.33022	9.56235
2015	6.25351	0.66626	2.88321	12.6827
2015	7.23562	0.677987	3.48094	14.6364
2015	4.71151	0.767981	2.38207	9.74307
2015	5.24838	0.789252	2.74731	10.7712
2015	4.63211	0.672034	2.05961	9.5059
2015	7.40645	0.624638	3.28122	14.9456
2015	8.22894	0.754316	4.35815	16.6253
2015	5.75135	0.829817	3.15704	11.7666
2015	7.64633	0.681922	3.54008	15.4653
2015	5.52491	0.719818	2.68266	11.2866
2015	4.52989	0.81047	2.35982	9.41014
2015	7.25992	0.561361	2.84301	14.6202
2015	7.53793	0.63376	3.25583	15.1853
2015	6.88406	0.557032	2.67904	13.8927
2015	7.77234	0.787948	4.35228	15.7498
2015	6.21944	0.794181	3.26099	12.6356
2015	8.14288	0.770442	4.50267	16.4744
2015	7.70177	0.657134	3.69003	15.5387
2015	7.223	0.656338	3.36396	14.5563
2015	8.21911	0.657231	3.9096	16.5666
2015	6.23314	0.534106	2.28671	12.5633
2015	7.43517	0.935824	4.55966	15.0736
2015	7.42373	0.685261	3.61334	15.034
2015	4.34417	0.808982	2.31526	9.04615
2015	7.24461	0.744864	3.85172	14.6699
2015	5.86844	0.700709	2.80317	11.9317
2015	7.62255	0.608708	3.38535	15.373
2015	8.51506	0.841599	5.09858	17.212
2015	6.84777	0.897912	4.04364	13.934
2015	6.54593	0.791055	3.5611	13.3202
2015	5.55211	0.867299	3.17058	11.3906
2015	6.3801	0.711746	3.17832	12.9775
2015	7.76925	0.724026	4.05493	15.7174
2015	7.41198	0.823687	4.28352	15.0427
2015	6.01405	0.832198	3.30321	12.264
2015	4.93606	0.810582	2.68498	10.2173
2015	7.31077	0.623074	3.3033	14.7886
2015	5.91073	0.672922	2.75887	12.0034
2015	5.16527	0.808331	2.77432	10.6337
2015	6.07684	0.965284	3.84455	12.4886
2015	7.64741	0.656926	3.65209	15.433
2015	7.65552	0.618102	3.39017	15.4258
2015	4.77084	0.820617	2.53787	9.88083
2015	7.59716	1.05478	5.31092	15.4798
2015	4.72887	0.734785	2.35643	9.74813
2015	7.63439	0.696496	3.75821	15.4345
2015	7.76554	0.776731	4.30214	15.7259
2015	7.66907	0.87148	4.65564	15.5482
2015	7.64376	0.630893	3.20786	15.4104
2015	6.42759	0.707189	3.21336	13.0339
2015	9.68587	0.92025	6.26563	19.57
2015	7.01632	0.743695	3.47705	14.2135
2015	8.32317	0.759499	4.4165	16.819
2015	5.233	0.763978	2.59006	10.7321
2015	7.87295	0.702889	3.9945	15.9015
2015	4.51817	0.637745	1.87338	9.25158
2015	5.11065	0.842029	2.8648	10.5406
2015	8.2734	0.648275	3.93493	16.6249
2015	8.59484	0.764469	4.57753	17.3064
2015	7.13709	0.567297	2.88302	14.3725
2015	6.64614	0.805439	3.57446	13.5015
2015	6.67028	0.90168	4.03787	13.5956
2015	7.05036	0.610791	3.07691	14.2446
2015	6.98653	0.559812	2.77341	14.0918
2015	8.57139	0.887595	5.28153	17.3425
2015	6.75426	0.533678	2.5094	13.5974
2015	6.93782	0.534469	2.65258	14.0022
2015	6.41689	0.817455	3.59441	13.0739
2015	7.32796	1.0225	5.11336	14.9902
2015	6.15479	0.678906	2.96847	12.532
2015	6.78889	0.714656	3.43132	13.726
2015	7.74361	0.677933	3.78928	15.6273
2015	6.15178	0.850531	3.48807	12.548
2015	5.3469	0.806805	2.82556	10.9892
2015	8.60027	0.731644	4.41029	17.3147
2015	4.81388	0.798662	2.50743	9.93102
2015	6.49833	0.873174	3.89102	13.2866
2015	6.89322	0.739128	3.59611	13.9769
2015	7.4929	0.526917	2.81887	15.1054
2015	4.41165	0.769765	2.12864	9.13872
2015	6.89471	0.635449	3.09431	13.9443
2015	7.85736	0.74273	4.12019	15.8644
2015	8.40766	0.77263	4.65935	16.9773
2015	8.83017	0.685815	4.06107	17.7975
2015	9.39008	0.895411	5.90608	18.9466
2015	8.83087	0.757969	4.75633	17.7918
2015	7.52425	0.841142	4.34647	15.247
2015	6.5393	0.534468	2.50435	13.2273
2015	3.73447	0.738262	1.84372	7.85663
2015	4.65372	0.840178	2.45474	9.64955
2015	7.69597	0.663612	3.52836	15.5342
2015	7.54728	0.716681	3.85409	15.2685
2015	7.97504	0.757869	4.36526	16.1128
2015	4.1813	0.811224	2.12645	8.73009
2015	4.47603	0.797047	2.26818	9.30919
2015	6.09214	0.792686	3.23392	12.4222
2015	4.30958	0.783663	2.24994	8.95927
2015	7.43352	0.617239	3.32841	15.0098
2015	8.20393	0.698925	3.92361	16.5625
2015	5.22451	0.993458	3.42725	10.873
2015	6.68802	0.793991	3.71171	13.6
2015	7.21093	0.600529	3.02477	14.5282
2015	5.53018	0.787507	2.82538	11.3261
2015	5.83181	0.844121	3.25459	11.9605
2015	6.39358	0.501998	2.1039	12.9088
2015	6.13028	0.857743	3.49852	12.5518
2015	7.22385	0.728331	3.74818	14.6656
2015	8.41162	0.746603	4.59551	16.9945
2015	4.23019	0.773963	2.093	8.83703
2015	7.3982	0.72823	3.85418	15.0024
2015	4.91215	0.735839	2.39075	10.0615
2015	6.50854	0.795401	3.5595	13.2492
2015	7.17303	0.614421	3.15341	14.4917
2015	7.4963	0.815692	4.28164	15.2216
2015	8.41848	0.727575	4.3329	16.9605
2015	3.91159	0.689344	1.75022	8.11583
2015	7.30953	0.576868	2.95329	14.759
2016	8.14518	1.04932	5.81542	16.6278
2016	10.1738	0.799288	6.14428	20.5417
2016	10.765	1.13894	8.64929	21.7463
2016	9.2654	0.886077	5.65399	18.7356
2016	11.1572	0.946108	7.61441	22.4484
2016	9.7213	0.731037	5.22457	19.6097
2016	10.5429	1.007	7.72737	21.314
2016	8.04338	0.846274	4.74947	16.3193
2016	11.0446	0.86486	7.05035	22.2493
2016	7.80799	1.20114	6.13711	15.9871
2016	7.15209	0.67067	3.37716	14.4852
2016	9.01282	1.0406	6.71723	18.3289
2016	8.49216	0.629126	3.87834	17.1182
2016	9.12011	0.834183	5.423	18.4152
2016	11.8413	1.03604	8.82332	23.9084
2016	10.0141	0.943116	7.08581	20.2576
2016	9.04865	0.913447	5.95216	18.3201
2016	9.65056	0.739316	5.2242	19.4491
2016	10.4802	1.11572	8.33149	21.2779
2016	9.78307	0.871271	6.4049	19.789
2016	8.80376	0.679684	4.4429	17.7582
2016	7.14983	0.836174	4.33412	14.592
2016	6.63371	0.830671	3.96305	13.551
2016	6.66407	0.969984	4.2648	13.6619
2016	6.15605	0.803372	3.41624	12.5558
2016	10.234	0.771415	5.45193	20.5839
2016	8.89171	0.726738	4.68082	17.9464
2016	9.43573	0.88607	6.1808	19.1099
2016	11.1919	0.907561	7.47838	22.5622
2016	4.9904	0.896857	2.93409	10.355
2016	10.4154	0.819533	6.15988	21.0255
2016	11.1383	0.827266	6.38926	22.4695
2016	9.74175	0.762	5.36749	19.6544
2016	9.00432	0.849079	5.50598	18.2308
2016	8.79048	0.572146	3.73907	17.6856
2016	8.10387	0.544799	3.26482	16.3422
2016	9.0872	0.707605	4.7028	18.3458
2016	8.45928	0.592963	3.69749	17.058
2016	8.94865	0.554785	3.41675	17.9618
2016	8.86601	0.734435	4.6969	17.8899
2016	7.50264	0.590669	3.21801	15.1584
2016	8.80356	0.725462	4.65959	17.7907
2016	9.05954	0.755844	4.84037	18.2755
2016	10.495	0.895061	6.90537	21.1843
2016	8.5895	0.829301	5.15776	17.4104
2016	5.45802	0.602333	2.21819	11.088
2016	9.75738	0.736664	5.30078	19.6591
2016	9.11471	0.558293	3.7559	18.3152
2016	6.99014	1.04319	4.89142	14.3382
2016	9.65409	0.926048	6.47811	19.5251
2016	10.6656	0.832896	6.5188	21.4588
2016	7.66544	0.923933	4.98227	15.6232
2016	11.0787	0.903167	7.34409	22.3499
2016	8.3477	0.973512	5.90157	16.9936
2016	7.6454	0.848703	4.61379	15.5356
2016	7.11365	0.950427	4.72979	14.5276
2016	5.55839	0.81962	3.06234	11.418
2016	6.72123	1.16827	5.40104	13.956
2016	9.08351	0.674975	4.48747	18.3245
2016	8.77704	0.808192	5.28996	17.7791
2016	8.49274	0.963999	5.9522	17.254
2016	9.54998	0.98427	6.55334	19.318
2016	7.79473	0.88361	4.65549	15.8366
2016	7.76908	0.658669	3.63271	15.7032
2016	8.82574	0.743735	4.74682	17.8279
2016	10.6409	0.77665	5.95961	21.4023
2016	8.25054	0.739388	4.38559	16.7006
2016	8.93101	0.782243	5.18378	18.0335
2016	6.93559	0.514829	2.62906	13.9946
2016	7.68333	0.541452	2.93497	15.4825
2016	8.76316	0.726932	4.53353	17.6825
2016	7.57461	0.884131	4.81259	15.3939
2016	6.93845	0.799271	3.9212	14.124
2016	9.37035	0.697635	4.83116	18.8739
2016	7.59267	0.560515	2.97031	15.2752
2016	8.70061	0.621516	3.75977	17.4628
2016	11.4265	0.80783	6.76746	23.0045
2016	10.0284	0.748005	5.57929	20.2109
2016	9.27264	0.988184	6.36044	18.7679
2016	9.16169	0.874441	5.77447	18.5345
2016	11.5228	0.968304	8.06802	23.2694
2016	7.61207	0.836047	4.41283	15.428
2016	9.41976	0.90148	6.17121	19.0515
2016	10.5864	0.796161	6.06666	21.3394
2016	9.29558	0.803107	5.09278	18.7637
2016	8.50261	0.885881	5.26484	17.2261
2016	6.9643	1.08391	5.10919	14.2908
2016	9.40672	1.12728	7.35601	19.1148
2016	7.22025	0.526927	2.70897	14.5463
2016	8.8137	1.06044	6.58436	17.9493
2016	10.6562	1.0866	8.39569	21.5993
2016	9.89334	1.1891	8.28617	20.1478
2016	9.52497	0.739388	5.20234	19.1921
2016	8.59349	1.06177	6.51519	17.4827
2016	7.68421	0.874145	4.93062	15.6367
2016	11.3269	0.909377	7.54814	22.7531
2016	7.60536	0.700939	3.77165	15.4173
2016	7.97037	0.854792	5.02427	16.2225
2016	9.25205	0.905637	6.16767	18.751
2016	7.29507	0.821796	4.10204	14.8331
2016	10.027	0.752635	5.47833	20.222
2016	8.78357	0.88627	5.59125	17.7508
2016	9.74909	0.719417	5.12883	19.6503
2016	10.027	0.752635	5.47833	20.222
2016	9.66387	0.831151	5.80513	19.4969
2016	6.37433	0.721775	3.17388	12.9718
2016	6.42753	0.635392	2.83026	13.0245
2016	7.79165	0.913741	5.18408	15.9061
2016	11.6946	1.03955	9.12215	23.598
2016	10.228	0.968759	7.14704	20.6691
2016	10.8365	1.09246	8.5139	21.9526
2016	9.07129	0.908487	5.7409	18.3335
2016	7.68448	0.776939	4.21561	15.614
2016	5.55208	0.654483	2.50539	11.322
2016	8.16925	0.623968	3.80718	16.5002
2016	6.66992	0.691538	3.20295	13.5441
2016	5.54157	1.0129	3.62406	11.5455
2016	7.54997	0.500149	2.83775	15.2193
2016	9.03059	0.82778	5.25513	18.2437
2016	7.94975	0.742987	4.38056	16.0999
2016	6.57543	0.808601	3.80345	13.4076
2016	11.7408	0.909147	7.80139	23.6373
2016	8.43511	0.81958	4.7816	17.0699
2016	6.74197	1.08457	4.79182	13.869
2016	6.82902	0.948782	4.43415	13.9506
2016	8.87606	0.832317	5.32692	17.9438
2016	8.83979	0.613577	3.89614	17.8191
2016	7.436	1.19569	5.78451	15.2765
2016	9.07238	0.699814	4.6727	18.2891
2016	8.77166	0.69049	4.326	17.7029
2016	9.35455	0.872218	5.95128	18.9172
2016	8.44807	0.70692	4.28377	17.0593
2016	11.0611	0.887769	7.0434	22.2601
2016	11.4087	0.82949	6.70853	22.9516
2016	7.67131	0.719994	3.74081	15.5077
2016	7.4247	0.70036	3.72677	15.0106
2016	9.40285	0.922203	6.09779	19.048
2016	7.86175	0.775055	4.26835	15.9271
2016	9.70704	1.06893	7.51098	19.7369
2016	11.5667	1.13238	9.34131	23.3276
2016	6.80623	0.73568	3.53314	13.8412
2016	9.13977	0.774419	4.9872	18.5061
2016	5.87302	0.676085	2.70266	11.9394
2016	7.84546	0.763155	4.27031	15.8814
2016	7.56857	0.983939	5.11826	15.4679
2016	7.70436	0.77805	4.23279	15.6417
2016	10.1005	0.751497	5.66922	20.3182
2016	6.50795	1.0093	4.28708	13.3587
2016	7.5476	0.733308	4.07075	15.2888
2016	7.53313	1.13728	5.54551	15.4299
2016	8.14753	0.771428	4.45762	16.508
2016	8.94155	0.706786	4.5868	18.0769
2016	6.03331	1.0484	4.26451	12.4996
2016	6.95677	0.75983	3.63483	14.1088
2016	8.89898	0.683876	4.29008	17.8994
2016	6.62912	0.937222	4.17364	13.5481
2016	9.89314	0.790739	5.85714	19.966
2016	6.85942	0.830342	4.06108	13.9779
2016	7.04249	0.909164	4.51182	14.3715
2016	5.26019	0.901968	3.14712	10.9365
2016	12.1362	0.919176	8.3015	24.4458
2016	9.32985	0.679828	4.63691	18.8232
2016	9.36758	0.844298	5.72226	18.9067
2016	6.13195	0.516836	2.14233	12.3968
2016	9.51431	1.05666	7.15215	19.3136
2016	7.85184	0.679889	3.74907	15.8593
2016	10.8687	0.849326	6.86556	21.8819
2016	10.2883	0.791895	6.14731	20.7494
2016	7.98737	0.750377	4.25027	16.169
2016	7.14546	1.15081	5.31541	14.687
2016	8.57322	1.26624	7.08794	17.4828
2016	7.8785	0.798444	4.46255	15.9466
2016	7.79163	0.926429	5.04541	15.8729
2016	11.3883	0.848036	7.33538	22.9564
2016	6.80649	0.843152	3.96472	13.8713
2016	9.10075	0.774598	5.15502	18.356
2016	7.2604	0.922822	4.70163	14.7935
2016	8.0634	0.876247	5.00721	16.3892
2016	8.80015	0.905266	5.69272	17.8044
2016	8.57466	0.823152	5.30211	17.4029
2016	7.67911	0.994395	5.43764	15.702
2016	8.27622	0.837264	5.02265	16.8218
2016	7.70903	0.931442	4.96823	15.7199
2016	10.2473	0.874055	6.52291	20.7196
2016	9.00573	0.885516	5.68607	18.1967
2016	7.9607	1.14262	6.09418	16.2654
2016	9.16	0.652613	4.27778	18.4564
2016	7.92654	0.825173	4.54665	16.0462
2016	9.58409	0.867608	5.92073	19.3456
2016	9.52126	0.757717	5.21153	19.2278
2016	9.53744	0.888494	6.13017	19.2605
2016	7.19918	0.746863	3.57344	14.6197
2016	8.93755	0.841945	5.38083	18.024
2016	6.91681	0.640688	3.26317	14.0036
2016	10.4766	0.779137	6.08095	21.1334
2016	11.0367	0.806216	6.54673	22.207
2016	7.56337	0.760981	3.91398	15.3224
2016	9.25071	0.829097	5.52942	18.7335
2016	9.92941	0.676543	4.83829	19.9193
2016	8.07636	0.740778	4.17229	16.3207
2016	7.68292	0.826089	4.53934	15.599
2016	7.89559	0.830625	4.692	16.0079
2016	9.05954	0.755844	4.84037	18.2755
2016	10.2371	1.01027	7.11072	20.6731
2016	10.3604	0.922252	6.94301	20.9664
2016	10.1087	1.18867	8.38034	20.5409
2016	7.68292	0.826089	4.53934	15.599
2016	8.82561	1.01643	6.36145	17.9504
2016	9.03148	0.617141	4.04737	18.1649
2016	10.3166	1.15735	8.46301	20.9253
2016	11.4821	0.832569	6.77602	23.1061
2016	8.95988	0.960957	6.13792	18.1818
2016	10.4172	1.03581	7.85868	21.0774
2016	7.69027	0.959308	4.91062	15.6809
2016	8.71456	0.826186	5.31008	17.6473
2016	9.3902	0.791929	5.45873	18.9679
2016	5.26967	0.877574	3.11997	10.9361
2016	7.90848	0.751663	4.26884	16.0082
2016	6.31952	0.878579	3.71921	12.8763
2016	8.39611	0.73112	4.32973	17.0093
2016	10.8888	0.995531	7.85502	21.9568
2016	6.75431	1.1544	5.27769	13.9471
2016	8.07198	1.23351	6.60408	16.5577
2016	6.98916	0.854806	4.20889	14.3139
2016	9.4144	0.907815	6.28051	19.0687
2016	10.3902	0.943093	6.40604	21.1205
2016	6.09861	0.909012	3.66254	12.4874
2016	9.53335	0.708752	4.98302	19.2067
2016	12.3879	0.858184	8.04165	24.936
2016	8.01824	0.809381	4.66427	16.2563
2016	7.89669	0.802733	4.24582	15.9969
2016	7.72278	0.713705	3.98744	15.6376
2016	5.92111	0.922016	3.6515	12.1766
2016	7.69946	0.718575	3.99742	15.613
2016	9.13893	0.694524	4.66627	18.4848
2016	9.58426	0.817617	5.73908	19.3154
2016	9.89635	0.751403	5.51861	19.9227
2016	9.82144	0.892896	6.31483	19.8648
2016	11.7706	0.992382	8.70882	23.7
2016	9.59444	1.01105	6.85365	19.4531
2016	7.56771	0.96694	4.88314	15.3692
2016	8.28829	0.819544	4.92933	16.7925
2016	7.5077	0.785798	4.27593	15.306
2016	11.1037	1.03349	8.37291	22.4357
2016	9.19568	0.82625	5.54036	18.5561
2016	10.4068	0.838428	6.30534	21.0015
2016	7.92872	1.21186	6.5479	16.2829
2016	9.37695	0.886395	6.01673	18.9473
2016	7.48624	0.804355	4.15612	15.2081
2016	8.95228	0.764378	4.93065	18.0931
2016	7.22544	1.00748	4.82813	14.725
2016	9.02308	0.881808	5.85114	18.2432
2016	8.13136	0.632416	3.62559	16.3892
2016	6.4959	0.69337	3.18117	13.2331
2016	10.1613	0.814013	6.07187	20.4682
2016	8.15156	0.790747	4.62968	16.4685
2016	7.7704	0.809483	4.47411	15.7886
2016	7.35618	1.01955	4.97924	15.0004
2016	9.76424	0.826704	5.89869	19.6903
2016	8.70093	0.611117	3.88912	17.5149
2016	8.63733	0.685837	4.35461	17.4321
2016	9.52247	0.73147	5.04663	19.1835
2016	9.41681	0.702331	4.7281	18.9601
2016	9.89199	0.917501	6.64032	20.0111
2016	7.34857	0.777494	3.98067	14.9137
2016	10.1725	0.675267	5.01366	20.4593
2016	8.01791	0.856352	4.90689	16.259
2016	9.21215	0.877089	5.86746	18.6157
2016	10.038	0.752646	5.61776	20.2457
2016	9.29172	0.686918	4.73319	18.686
2016	9.79475	0.888911	5.9523	19.8208
2016	7.39956	0.880797	4.47981	15.0611
2016	9.94559	0.782988	5.7712	20.0437
2016	7.05754	0.913255	4.40645	14.3741
2016	8.4185	0.960969	5.79882	17.1488
2016	8.2354	0.730384	4.18471	16.6199
2016	7.66037	0.795716	4.39802	15.532
2016	9.30722	0.690525	4.7537	18.7489
2016	9.58656	0.728663	5.07108	19.3044
2016	7.9044	0.781426	4.33461	16.0054
2016	11.4761	0.778423	6.8066	23.1003
2016	10.5833	0.84688	6.65431	21.311
2016	8.26132	0.739641	4.4125	16.6901
2016	8.24296	0.858837	5.09989	16.7448
2016	10.0565	1.00615	7.36948	20.3276
2016	11.0607	1.01483	8.04158	22.3456
2016	7.97857	0.844162	4.82288	16.2108
2016	9.52297	0.880126	5.61427	19.2553
2016	8.41651	0.772714	4.70856	17.0132
2016	5.82473	0.967973	3.81878	11.9781
2016	4.92611	0.836828	2.72569	10.282
2016	8.31315	0.838058	5.0498	16.8638
2016	7.08504	1.01373	4.84675	14.5077
2016	8.99197	0.788467	5.29525	18.1671
2016	5.96248	0.775146	3.11305	12.1446
2016	5.90474	0.816554	3.34655	12.117
2016	8.80721	0.67771	4.39985	17.7321
2016	8.53809	0.692655	4.06672	17.1783
2016	9.21249	0.72281	4.93487	18.5734
2016	7.57236	0.75621	3.87904	15.3432
2016	9.99603	0.878058	6.42873	20.1629
2016	8.92664	0.758639	4.80234	18.0154
2016	11.0521	1.03871	8.15725	22.3178
2016	11.7783	0.960274	8.49821	23.7618
2016	9.33137	0.797963	5.36134	18.8013
2016	8.32865	0.631573	3.73335	16.7639
2016	8.94715	0.780119	4.95114	18.0609
2016	8.11319	0.823365	4.75958	16.4145
2016	5.91129	0.990348	4.00493	12.2062
2016	9.54762	0.877248	5.98758	19.2735
2016	6.01763	0.833181	3.60168	12.358
2016	11.0351	0.833891	6.81256	22.234
2016	7.56246	0.570316	3.08701	15.2354
2016	7.40461	0.657938	3.44269	14.9772
2016	8.49568	0.646942	3.94275	17.1135
2016	8.64657	0.707267	4.52778	17.4551
2016	9.17021	0.737396	4.91843	18.5273
2016	9.8029	0.85162	6.10607	19.8185
2016	7.84289	0.865177	4.82939	15.9409
2016	7.74687	0.621498	3.22713	15.9167
2016	5.32008	0.853589	2.90619	10.9836
2016	8.14907	0.614054	3.6265	16.429
2016	9.10782	0.626915	4.14015	18.3439
2016	9.6426	0.784777	5.51244	19.4168
2016	7.83119	0.649676	3.62381	15.857
2016	8.16866	0.544812	3.19169	16.4503
2016	8.21718	0.8502	5.0618	16.6758
2016	8.89628	0.638743	4.04201	17.8793
2016	8.4625	0.756705	4.52846	17.101
2016	4.79919	0.745748	2.43108	9.93058
2016	4.86685	0.829196	2.64058	10.0788
2016	8.58543	0.808657	5.02138	17.3819
2016	8.12963	1.07811	5.78913	16.5766
2016	10.6335	0.830646	6.61306	21.3652
2016	9.25182	0.798799	5.33831	18.7117
2016	7.51681	0.842061	4.48107	15.27
2016	9.99839	0.907175	6.63962	20.1848
2016	8.60454	0.685698	4.32662	17.3876
2016	9.3565	0.659413	4.56688	18.8389
2016	8.68863	0.850345	5.2929	17.5949
2016	7.24761	0.724187	3.58269	14.7068
2016	8.71663	0.608931	3.78102	17.5384
2016	9.59501	0.716217	5.03853	19.3152
2018	7.51751	0.922259	4.7569	15.2908
2018	8.86314	0.913061	5.88441	17.989
2018	7.83611	1.0979	5.93828	16.05
2018	8.79017	0.931682	5.72536	17.7956
2018	7.72051	0.694301	3.88331	15.6013
2018	8.38218	1.00381	5.75377	17.029
2018	9.45375	0.899612	5.99284	19.1008
2018	8.29333	0.851936	5.00338	16.7857
2018	6.04462	0.958704	3.80717	12.4242
2018	5.07157	0.856031	2.89646	10.534
2018	8.65444	0.887114	5.47953	17.5401
2018	5.98097	0.887007	3.66772	12.2715
2018	10.6696	1.12993	8.73494	21.6312
2018	7.0134	1.01739	4.74223	14.3471
2018	5.88508	0.909485	3.56886	12.085
2018	5.59369	0.923451	3.50588	11.5484
2018	8.33581	1.06995	6.14145	16.9735
2018	7.67078	0.647242	3.57156	15.4681
2018	8.63456	0.843813	5.32661	17.4864
2018	9.6032	0.928085	6.15616	19.3756
2018	9.41082	1.01205	6.65642	19.0775
2018	8.50133	0.868287	5.27484	17.2024
2018	4.56382	0.730322	2.21702	9.40799
2018	8.66177	0.898249	5.46023	17.5177
2018	9.74541	1.0164	7.08621	19.7483
2018	7.95207	0.747378	4.27138	16.1111
2018	9.03014	0.909376	5.73855	18.2396
2018	5.37779	0.926534	3.3456	11.117
2018	6.18343	0.940994	3.83333	12.6795
2018	9.72876	0.898785	6.35523	19.6967
2018	6.34966	0.984721	4.02958	12.9976
2018	8.53129	0.791671	4.83173	17.2383
2018	9.31894	1.02428	6.86917	18.9469
2018	8.95865	0.843995	5.48539	18.1109
2018	8.65045	0.846478	5.28404	17.5586
2018	9.58738	0.856999	5.87116	19.3458
2018	8.9924	0.82933	5.28595	18.1636
2018	8.40024	0.85707	5.06467	17.0616
2018	6.92963	1.19755	5.39106	14.2661
2018	9.10964	0.952695	6.12402	18.4106
2018	7.93778	0.766926	4.22294	16.0625
2018	7.28381	1.04164	5.23331	14.9083
2018	8.77173	0.95796	5.94122	17.793
2018	9.54123	0.844333	5.78055	19.2425
2018	7.95828	1.10946	5.93253	16.2238
2018	9.43206	0.893768	6.234	19.1172
2018	7.14242	1.03573	5.06973	14.5922
2018	6.47674	1.00511	4.29819	13.2837
2018	8.47011	0.680462	4.14164	17.1119
2018	10.3275	0.975842	7.18802	20.9364
2018	5.35419	0.872326	3.12741	11.0541
2018	7.97483	0.698636	3.65248	16.0742
2018	8.96898	0.839827	5.44404	18.1304
2018	10.2817	1.03805	7.50378	20.7935
2018	6.72228	1.00215	4.53141	13.7835
2018	7.09024	1.02772	4.94826	14.5105
2018	4.72425	0.781702	2.42567	9.77421
2018	6.95547	0.971354	4.54625	14.2
2018	7.26279	1.01602	5.10474	14.8705
2018	6.61399	0.914553	3.99776	13.4777
2018	8.7636	1.08493	6.69417	17.872
2018	10.2059	1.12187	8.18525	20.7182
2018	7.98368	0.866451	4.88864	16.2008
2018	7.33934	0.668422	3.43503	14.8109
2018	6.96835	0.924394	4.45573	14.247
2018	7.65772	0.696584	3.80993	15.5071
2018	8.28456	0.757973	4.47377	16.7308
2018	9.90168	0.888294	6.43763	20.0101
2018	8.5535	0.994355	6.03496	17.393
2018	6.05142	1.25439	4.80414	12.6169
2018	6.90267	1.05296	4.92753	14.1588
2018	7.27053	0.810092	4.0365	14.7352
2018	10.2631	0.878168	6.46069	20.6841
2018	8.46091	0.866755	5.14279	17.1545
2018	7.24133	0.774364	3.90219	14.7032
2018	7.74013	1.00422	5.26734	15.7676
2018	7.10296	0.704498	3.58695	14.4033
2018	6.78329	1.01007	4.55976	13.8644
2018	9.30693	1.08438	7.12433	18.9112
2018	9.43433	0.780136	5.31401	19.0128
2018	10.0712	0.848717	6.25578	20.3325
2018	8.37364	0.765583	4.59695	16.9465
2018	4.88757	0.940068	2.89514	10.1553
2018	6.28897	1.08276	4.51041	13.0135
2018	9.08379	0.920951	5.90073	18.3916
2018	8.22567	0.869029	4.86678	16.6408
2018	10.5864	1.07829	7.91372	21.4367
2018	8.24294	0.740801	4.49828	16.6917
2018	7.05784	0.755759	3.63867	14.3123
2018	6.84545	1.01548	4.70488	14.0217
2018	9.54644	0.953677	6.52494	19.3564
2018	6.19253	1.14762	4.54911	12.8078
2018	7.91885	0.851591	4.69896	16.0415
2018	8.11829	0.840203	4.83792	16.4435
2018	5.99683	0.621655	2.52669	12.1932
2018	7.06502	0.710653	3.40495	14.2736
2018	7.10517	0.765006	3.75779	14.3891
2018	8.88562	0.950537	6.00153	18.0075
2018	8.13568	0.644203	3.83894	16.4071
2018	10.1887	0.995494	7.20145	20.6209
2018	7.81166	0.886945	4.77165	15.8279
2018	9.90111	0.971308	6.85921	19.9737
2018	7.20374	1.00559	4.84996	14.6935
2018	5.82879	0.846521	3.38635	11.9505
2018	6.93259	0.695471	3.38173	14.0416
2018	7.40182	0.960262	4.96431	15.1133
2018	4.84931	1.00649	3.18778	10.132
2018	7.97347	0.724583	4.17804	16.1744
2018	6.56021	1.02576	4.60547	13.4745
2018	7.07939	0.715643	3.54389	14.3416
2018	8.28981	0.938299	5.41748	16.8229
2018	8.67857	1.30287	7.69898	17.7789
2018	5.76141	1.01451	3.87852	11.8492
2018	7.30345	0.809225	4.14036	14.8324
2018	6.42322	0.866893	3.92321	13.1074
2018	6.69427	1.09314	5.00871	13.7697
2018	5.51225	0.692216	2.655	11.2739
2018	9.90987	0.892582	6.43979	20.0465
2018	6.5863	0.655653	2.90521	13.331
2018	10.9995	1.04877	8.33623	22.2233
2018	9.45834	0.988095	6.61439	19.1965
2018	8.25028	0.912059	5.22036	16.7404
2018	8.68418	0.852865	5.29578	17.6045
2018	7.08124	0.896596	4.24518	14.4001
2018	5.76443	1.00251	3.78275	11.8871
2018	6.0086	0.8639	3.45521	12.2963
2018	7.28855	1.1023	5.42308	14.9758
2018	5.46435	0.866652	3.22298	11.2684
2018	5.7187	0.868344	3.25802	11.7636
2018	10.9723	0.986307	7.80757	22.1616
2018	9.26921	0.856182	5.69699	18.6851
2018	6.53634	0.954041	4.30607	13.4221
2018	7.71793	1.20212	6.29101	15.8173
2018	8.02763	0.802193	4.68229	16.2676
2018	6.16158	1.16624	4.61404	12.8233
2018	5.08853	1.0404	3.41021	10.6339
2018	6.42066	1.08193	4.67284	13.2484
2018	7.79432	0.80326	4.49991	15.7549
2018	6.26503	0.884333	3.87178	12.8437
2018	9.0586	1.09774	6.99432	18.4355
2018	8.08834	0.861681	4.82722	16.4274
2018	5.94082	0.937778	3.71817	12.2263
2018	7.46761	0.976267	5.04434	15.2237
2018	6.64472	0.927915	4.11363	13.5712
2018	8.91983	0.82667	5.27918	18.062
2018	9.14474	0.909387	5.8407	18.4843
2018	4.86054	0.918615	2.78987	10.1324
2018	8.2391	0.84457	4.92722	16.6859
2018	7.64043	0.681246	3.7503	15.4542
2018	8.22061	0.788035	4.71838	16.6509
2018	9.61429	1.21804	8.14424	19.5597
2018	7.07431	1.00807	4.77581	14.4275
2018	9.3551	0.973089	6.46307	18.946
2018	4.88821	0.860495	2.69747	10.1444
2018	6.93666	1.15293	5.40346	14.3009
2018	8.33868	0.890245	5.29221	16.9187
2018	6.5032	0.96628	4.35681	13.3317
2018	8.34984	0.782761	4.66768	16.8988
2018	8.10549	0.883098	5.17044	16.4518
2018	9.26549	0.90032	5.95227	18.7204
2018	10.3067	0.917772	6.69633	20.8031
2018	9.35012	0.870401	5.75782	18.9179
2018	10.2362	0.855053	6.30429	20.6361
2018	5.9729	1.2157	4.8443	12.4825
2018	8.00771	0.900849	5.08647	16.2792
2018	7.45346	0.851647	4.37027	15.1894
2018	8.12137	0.794474	4.48332	16.4342
2018	5.12805	0.660161	2.3728	10.4879
2018	5.98506	0.82461	3.39265	12.2503
2018	6.91	0.965993	4.47611	14.126
2018	6.68887	0.827917	3.81881	13.6053
2018	8.80491	0.865921	5.37547	17.8012
2018	8.45436	0.780033	4.72313	17.0654
2018	6.43939	0.672994	3.01211	13.0423
2018	8.78239	0.72816	4.59984	17.6974
2018	7.32142	0.693472	3.55723	14.83
2018	4.45824	0.766643	2.21811	9.21472
2018	9.21364	0.902583	5.89219	18.6222
2018	8.47711	0.811376	4.86802	17.1607
2018	9.18612	0.934626	6.12379	18.5927
2018	5.5145	0.766458	2.81295	11.2751
2018	6.33046	1.04019	4.47018	13.0794
2018	6.58473	0.78948	3.60639	13.3879
2018	6.74319	1.0017	4.44885	13.7732
2018	6.39272	1.12898	4.72826	13.1915
2018	10.4837	0.977248	7.28879	21.1863
2018	9.30806	0.773673	5.20787	18.7369
2018	7.88994	0.878643	4.9033	16.0262
2018	6.46327	0.659713	2.82454	13.0941
2018	9.22477	0.926185	6.1508	18.737
2018	8.07656	1.06209	5.82209	16.4523
2018	6.58708	1.06427	4.70444	13.5538
2018	5.19832	1.0851	3.56948	10.8833
2018	6.89713	0.917556	4.26783	14.039
2018	7.04394	1.11822	5.31343	14.4701
2018	7.46318	0.898222	4.62611	15.1702
2018	9.54953	0.782134	5.33684	19.2399
2018	10.6604	1.08639	8.14679	21.5481
2018	6.08037	0.977303	3.93402	12.5639
2018	7.4712	0.724801	3.84324	15.165
2018	7.95864	1.17581	6.42698	16.2703
2018	6.33019	0.768497	3.3961	12.9349
2018	5.77259	1.00106	3.83357	11.9626
2018	7.33133	0.60661	3.25575	14.8187
2018	7.61596	1.21766	6.35921	15.6706
2018	9.52966	1.23426	7.98811	19.3933
2018	8.96401	0.958591	6.0648	18.1817
2018	10.0298	1.18827	8.27501	20.3657
2018	5.63638	0.878989	3.30204	11.5881
2018	8.16315	0.774901	4.5188	16.5232
2018	9.7463	1.24441	8.50148	19.8688
2018	6.5358	0.699532	3.26564	13.282
2018	8.36715	0.695097	4.0567	16.882
2018	6.30225	1.02827	4.40363	12.9806
2018	7.15601	1.03362	5.0586	14.6683
2018	8.9173	0.748717	4.83348	17.998
2018	6.67984	0.830331	3.8402	13.6022
2018	6.5766	0.98473	4.39537	13.5246
2018	8.90821	0.807198	5.16623	18.0046
2018	5.02053	0.84188	2.75686	10.39
2018	4.56035	0.944381	2.6791	9.5977
2018	4.40786	1.01135	2.74795	9.36789
2018	7.34194	0.974571	4.88829	14.9832
2018	6.35688	1.06478	4.68039	13.1589
2018	5.1628	0.867499	2.88948	10.6629
2018	6.68543	0.74285	3.52132	13.6044
2018	8.41215	0.784737	4.71021	16.9994
2018	9.00712	0.848306	5.52099	18.2177
2018	7.19026	0.801146	4.10167	14.6184
2018	7.97333	0.928837	5.1841	16.24
2018	9.34022	0.861263	5.727	18.8396
2018	6.81657	1.03201	4.73881	13.9395
2018	9.8251	1.06099	7.45081	19.9261
2018	6.17973	0.938552	3.80534	12.6006
2018	7.26307	0.869381	4.3614	14.7725
2018	5.34875	0.857765	3.11717	11.0347
2018	10.053	1.08149	7.75367	20.4055
2018	7.70925	0.781003	4.21486	15.6254
2018	9.55164	0.848569	5.50806	19.2462
2018	8.69806	0.883713	5.35829	17.6066
2018	11.1009	1.05097	8.4559	22.4588
2018	9.2203	0.839345	5.46222	18.6442
2018	8.62234	0.718171	4.43991	17.3828
2018	5.16758	0.893271	3.13459	10.6979
2018	9.12935	0.904839	6.02516	18.4911
2018	5.30469	0.910384	3.2858	10.9721
2018	9.37048	0.843114	5.66582	18.9381
2018	6.25481	0.863481	3.56735	12.7803
2018	5.72011	0.90545	3.41995	11.7729
2018	6.24328	0.921812	3.78508	12.7756
2018	7.51439	0.706453	3.6912	15.2476
2018	8.101	0.712942	3.61182	16.3484
2018	6.33491	0.674221	2.90355	12.8276
2018	8.33478	0.75553	4.53701	16.8578
2018	5.73686	0.917184	3.51222	11.8433
2018	9.37071	0.91527	6.13108	18.9862
2018	8.58863	0.825701	5.07585	17.3712
2018	9.15324	0.902089	5.83135	18.4773
2018	6.09747	1.02789	4.1915	12.5236
2018	7.04046	0.695698	3.41862	14.2332
2018	9.63282	0.836142	5.73973	19.4606
2018	7.02269	0.9849	4.62539	14.3073
2018	6.90879	0.969976	4.50725	14.0803
2018	5.03424	0.895944	2.94627	10.4381
2018	7.82424	0.678448	3.80672	15.8212
2018	7.26468	0.809163	4.17413	14.7741
2018	8.27282	0.804494	4.8192	16.7561
2018	7.66511	0.926896	4.9461	15.6372
2018	6.95867	1.03762	4.91091	14.2634
2018	5.08726	0.940223	3.22414	10.5947
2018	6.58198	0.652294	2.93313	13.3323
2018	8.90324	0.934927	5.99893	18.038
2018	7.08904	1.23982	5.86225	14.6656
2018	5.32117	0.985027	3.31435	11.0283
2018	8.24786	1.06834	6.15743	16.8487
2018	8.60216	0.788863	4.82237	17.3734
2018	8.41008	0.804496	4.76635	17.0088
2018	7.57499	0.991204	4.9822	15.4106
2018	7.38625	0.640255	3.37789	14.9158
2018	10.4217	1.05708	7.96594	21.0912
2018	8.588	0.986086	6.05237	17.4411
2018	10.4779	0.855401	6.3151	21.1349
2018	6.17606	1.04946	4.43179	12.7889
2018	10.6841	1.01105	7.62923	21.5665
2018	8.34994	0.753225	4.55095	16.8989
2018	8.14308	0.795094	4.51178	16.4938
2018	4.89554	0.856423	2.73187	10.184
2018	8.55023	0.901272	5.59792	17.3498
2018	7.36421	1.16628	5.63873	15.0975
2018	4.61394	0.85306	2.47384	9.60496
2018	8.72832	0.94854	5.8928	17.6811
2018	8.47912	0.873862	5.23515	17.1952
2018	6.4365	1.23316	5.12643	13.3577
2018	7.69814	0.740791	4.01275	15.5637
2018	7.72576	0.871803	4.78071	15.7251
2018	9.11015	0.899967	5.84229	18.4214
2018	8.93414	0.946223	6.13165	18.0927
2018	8.80745	0.873498	5.4814	17.822
2018	8.54665	1.01701	6.15099	17.3941
2018	6.72484	0.945933	4.20294	13.7653
2018	9.06323	0.844012	5.34807	18.305
2018	9.82868	0.946859	6.59389	19.8859
2018	8.71624	0.841603	5.29711	17.6357
2018	8.04661	0.748586	4.28646	16.3027
2018	9.57987	0.882493	6.1127	19.3633
2018	6.36129	0.960767	4.05457	13.0559
2018	9.75687	0.850295	6.01346	19.6859
2018	6.7195	0.936191	4.34843	13.7312
2018	5.83848	0.866985	3.34172	11.9632
2018	6.72632	0.951685	4.34761	13.7653
2018	8.6263	0.875867	5.24684	17.4302
2018	9.45171	0.871424	6.01011	19.1237
2018	6.38384	0.983938	4.24046	13.1165
2018	9.00017	0.780346	5.06905	18.1943
2018	7.81679	0.982754	5.26927	15.8889
2018	7.74261	0.73628	4.06699	15.6591
2018	9.06454	0.905699	5.82641	18.3305
2018	8.47548	0.836241	5.0829	17.1789
2018	8.73838	0.923225	5.62411	17.6924
2018	8.57668	0.810353	4.88292	17.3356
2018	8.40687	0.855478	5.10373	17.0389
2018	9.4471	0.976341	6.59767	19.1364
2018	8.17453	0.77935	4.4048	16.5161
2018	9.45866	1.11159	7.53061	19.1856
2018	7.45665	1.22842	6.061	15.3136
2018	6.51143	0.856712	3.91144	13.3363
2018	6.37018	0.978045	4.11043	13.0522
2018	10.1267	0.908866	6.78805	20.477
2018	7.31047	1.03341	5.15363	14.92
2018	5.32027	0.918398	3.27574	11.0327
2018	6.92102	0.84765	3.97511	14.0904
2018	7.04304	1.19418	5.61072	14.4798
2018	6.00753	0.811654	3.26612	12.2718
2018	8.54002	0.858712	5.15434	17.2873
2018	8.24055	0.814804	4.78781	16.7034
2018	7.21473	0.713886	3.52293	14.5538
2018	6.92016	1.06033	4.80704	14.1805
2018	6.10857	1.00506	4.04588	12.609
2018	6.26022	1.11008	4.60428	12.9648
2018	5.73192	0.924555	3.54925	11.8203
2018	6.22057	1.10397	4.4998	12.8707
2018	8.68764	1.03804	6.35612	17.6679
2018	7.44539	1.08151	5.5641	15.238
2018	5.0745	0.873542	2.89184	10.4596
2018	5.36994	0.988866	3.46017	11.1814
2018	6.58044	0.973185	4.31525	13.4839
2018	7.70054	0.961279	5.10502	15.6657
2018	8.34305	0.773384	4.60655	16.8684
2018	6.35449	0.903396	3.9274	13.0268
2018	10.6581	0.908332	7.1126	21.5439
2018	8.79301	1.01273	6.31409	17.8523
2018	7.36623	0.80232	4.0446	14.9631
2018	5.24222	0.800829	2.83261	10.8003
2018	10.8743	0.92502	7.26935	21.9154
2018	8.83995	0.911547	5.78098	17.9442
2018	7.21121	0.7047	3.55857	14.5915
2018	7.97272	0.740541	4.25733	16.1344
2018	4.91042	1.05419	3.29041	10.3137
2018	7.94559	0.69273	3.97498	16.0681
2018	7.42272	0.984304	4.84733	15.0852
2018	6.74804	0.641191	3.08856	13.6769
2018	6.33354	1.062	4.4648	13.0187
2018	6.05136	0.824602	3.42866	12.3944
2018	5.00665	0.854394	2.79446	10.3696
2018	6.12119	0.832755	3.49383	12.5651
2018	6.76345	0.969764	4.5494	13.8512
2018	10.9396	1.17595	8.90268	22.1142
2018	8.18912	0.755095	4.50345	16.5394
2018	9.73712	1.07559	7.35786	19.7125
2018	8.81753	1.17083	7.00074	17.9554
2018	7.72908	0.873577	4.72967	15.6762
2018	7.16746	1.13618	5.46237	14.7148
2018	9.68494	0.965208	6.42122	19.5853
2018	9.32562	0.913799	6.16004	18.9155
2018	8.92217	0.831616	5.38297	18.0322
2018	9.73328	0.945627	6.36616	19.6416
2018	7.73974	0.749602	4.10034	15.6933
2020	8.7017	0.733329	4.42142	17.561
2020	8.34149	0.672426	4.12686	16.8431
2020	6.30556	0.553425	2.40993	12.7737
2020	9.17088	0.614157	3.85102	18.4968
2020	11.1107	0.768359	5.77038	22.3747
2020	8.52597	0.638658	3.71774	17.1956
2020	8.17105	0.734572	4.10837	16.5786
2020	6.26827	0.529436	2.20904	12.693
2020	9.07376	0.581313	3.42416	18.2229
2020	8.18643	0.732149	4.096	16.544
2020	9.50961	0.585642	3.74936	19.0724
2020	8.41999	0.712771	4.24754	16.9837
2020	7.84949	0.570815	3.12237	15.7974
2020	8.52724	0.585695	3.48707	17.1634
2020	9.64351	0.837968	5.39222	19.4334
2020	8.00071	0.54137	2.69535	16.1069
2020	8.83984	0.672554	3.9542	17.792
2020	8.52409	0.598855	3.10559	17.186
2020	6.51392	0.72853	3.18705	13.2279
2020	6.49117	0.61164	2.72141	13.139
2020	7.03902	0.739327	3.4865	14.2318
2020	6.61824	0.532665	2.41578	13.3862
2020	9.32272	0.679427	4.26409	18.7457
2020	8.82084	0.597063	3.54545	17.7329
2020	8.74184	0.656038	3.90065	17.584
2020	6.34665	0.820926	3.44276	12.9645
2020	5.50542	0.507997	1.84197	11.1584
2020	5.03207	0.715898	2.21309	10.356
2020	8.53062	0.700028	3.81301	17.2313
2020	8.88828	0.596175	3.29579	17.8977
2020	5.73852	0.713075	2.73026	11.737
2020	6.66659	0.555974	2.58128	13.4611
2020	10.1242	0.714826	4.84041	20.3807
2020	5.15566	0.704705	2.34665	10.5579
2020	9.47424	0.602799	4.00276	19.0439
2020	7.22522	0.535687	2.75718	14.5984
2020	9.03075	0.66749	4.12972	18.1871
2020	8.27946	0.572062	2.97515	16.5849
2020	8.43231	0.652928	3.90976	17.0339
2020	5.25505	0.712411	2.47022	10.7733
2020	4.91976	0.477223	1.6219	10.013
2020	5.97656	0.738598	2.89155	12.1651
2020	7.02972	0.697977	3.23073	14.2535
2020	7.96295	0.700108	3.68723	16.104
2020	9.69871	0.824222	5.41313	19.5647
2020	5.5356	0.558483	2.07739	11.2286
2020	7.69882	0.728477	3.79652	15.5643
2020	7.49032	0.567466	2.83286	15.1289
2020	8.60434	0.738584	4.4866	17.4061
2020	7.20906	0.625538	3.04086	14.5589
2020	7.63138	0.639522	3.4163	15.4
2020	6.68222	0.614184	2.80747	13.519
2020	6.70863	0.598893	2.76747	13.5564
2020	8.93494	0.640894	4.05782	17.9582
2020	6.81224	0.646174	3.00378	13.8064
2020	6.7722	0.624408	2.87253	13.6825
2020	6.54634	0.608008	2.69665	13.2092
2020	4.25796	0.5905	1.6134	8.72442
2020	5.56979	0.643696	2.38361	11.3524
2020	9.71609	0.716414	4.27534	19.5684
2020	8.52446	0.607826	3.7217	17.1328
2020	6.31656	0.703845	3.05156	12.8228
2020	6.72049	0.68722	3.16109	13.6281
2020	8.39829	0.68922	3.73195	16.962
2020	10.2803	0.702562	4.97449	20.6848
2020	8.72211	0.606416	3.45311	17.5935
2020	8.95583	0.583825	3.75359	18.0368
2020	6.37736	0.588629	2.48285	12.907
2020	7.03215	0.539825	2.63287	14.9371
2020	8.41101	0.618845	3.71915	16.9381
2020	6.49059	0.753233	2.96216	13.1455
2020	6.16025	0.524383	2.00202	12.4463
2020	9.5126	0.799198	5.35243	19.1753
2020	4.85388	0.642873	1.95917	9.89582
2020	5.29067	0.613669	1.94562	10.7841
2020	5.28007	0.657241	2.2906	10.7921
2020	3.84697	0.488122	1.30057	7.90946
2020	8.16657	0.589534	3.14183	16.4113
2020	7.50163	0.595278	3.03622	15.1307
2020	9.06458	0.719532	4.26756	18.2307
2020	6.26055	0.621059	2.51432	12.6939
2020	6.36033	0.691093	2.97613	12.911
2020	6.37148	0.620232	2.54981	12.9107
2020	6.43083	0.596649	2.64949	13.0009
2020	8.01751	0.784153	4.03808	16.163
2020	6.12473	0.63495	2.63313	12.4281
2020	5.56281	0.598879	2.18677	11.3273
2020	5.32437	0.697973	2.32414	10.8925
2020	5.82862	0.63436	2.40005	11.8549
2020	7.37084	0.649904	3.4436	14.924
2020	8.18566	0.649778	3.42734	16.4884
2020	6.49387	0.521833	2.39853	13.1215
2020	7.78144	0.614339	3.12077	15.7208
2020	7.0277	0.650233	3.01936	14.1803
2020	8.08125	0.71824	3.9491	16.3076
2020	6.17891	0.688602	2.91182	12.5805
2020	7.67041	0.555937	2.84115	15.4414
2020	8.68693	0.683425	3.95774	17.4968
2020	7.81545	0.530523	2.83928	15.7241
2020	8.71037	0.687177	4.08978	17.5792
2020	6.54216	0.779229	3.47895	13.3349
2020	8.43905	0.636768	3.81997	17.0196
2020	7.0563	0.603876	2.74296	14.2537
2020	6.66153	0.555693	2.66636	13.4543
2020	8.22821	0.739286	4.01229	16.6474
2020	7.34841	0.740649	3.83299	14.8936
2020	6.42471	0.503859	2.34077	12.9882
2020	6.03025	0.571941	2.05852	12.2115
2020	8.90029	0.72817	4.51232	17.9206
2020	6.87593	0.549869	2.55258	13.8712
2020	9.54622	0.686109	4.66098	19.2546
2020	8.86715	0.731695	4.45622	17.8496
2020	5.83881	0.556926	2.21876	11.8215
2020	8.50007	0.528636	3.21398	17.0876
2020	7.16136	0.590542	2.84251	14.4086
2020	7.62274	0.779201	4.04546	15.3999
2020	9.25429	0.753113	4.91515	18.669
2020	8.35076	0.714681	4.24052	16.9129
2020	7.28873	0.76717	3.96697	14.7811
2020	8.77591	0.697187	4.39908	17.6833
2020	5.7919	0.555263	2.17463	11.7365
2020	6.28382	0.653204	2.63703	12.73
2020	10.321	0.741321	5.09282	20.765
2020	6.66719	0.528679	2.41427	13.4488
2020	6.35442	0.634911	2.68783	12.8403
2020	7.94374	0.606638	3.37691	16.0124
2020	10.4035	0.801443	5.1323	20.8873
2020	9.6377	0.723593	4.85358	19.4035
2020	9.17568	0.651342	4.03517	18.4698
2020	7.07567	0.667493	3.12978	14.2696
2020	9.62516	0.684945	4.69687	19.3924
2020	8.62422	0.543967	3.02178	17.3397
2020	7.78717	0.712122	3.87463	15.7282
2020	6.39409	0.56738	2.37482	12.9369
2020	6.71303	0.622848	2.88503	13.5631
2020	9.24626	0.634916	4.02806	18.5915
2020	8.90452	0.655165	4.14162	17.9416
2020	8.11853	0.606418	3.37977	16.3577
2020	8.62638	0.638745	3.54593	17.3634
2020	6.07082	0.606305	2.52735	12.3167
2020	9.77569	0.760978	4.87316	19.7287
2020	9.39404	0.754669	4.7414	18.8964
2020	6.82508	0.590738	2.73806	13.7885
2020	5.45704	0.672288	2.44006	11.1202
2020	6.06008	0.700035	2.87549	12.3442
2020	8.18522	0.537749	3.04285	16.4792
2020	6.06577	0.61579	2.42456	12.3098
2020	8.81485	0.691744	3.9632	17.741
2020	7.33804	0.626037	3.21135	14.8197
2020	6.7553	0.680884	2.94158	14.1834
2020	7.60419	0.751693	3.88702	15.3838
2020	9.26864	0.655707	4.26499	18.6768
2020	8.46282	0.724784	4.25565	17.0801
2020	9.51697	0.622023	4.0898	19.1394
2020	5.80609	0.61226	2.25471	11.7734
2020	8.43621	0.599865	3.4705	16.9804
2020	10.0793	0.706055	4.76683	20.2617
2020	9.70675	0.677792	4.65464	19.5525
2020	6.7101	0.638513	3.00672	13.5973
2020	7.42756	0.702085	3.50611	15.0167
2020	7.68492	0.665221	3.53528	15.546
2020	6.57103	0.664734	2.99229	13.3122
2020	7.33375	0.621736	3.07184	14.8137
2020	6.49439	0.67524	3.12653	13.1992
2020	8.0542	0.778547	4.21391	16.2861
2020	6.19137	0.619287	2.5087	12.5631
2020	8.42483	0.598341	3.64342	16.9584
2020	8.44484	0.68229	3.90302	17.039
2020	9.46269	0.680938	4.25601	19.0629
2020	7.23952	0.701252	3.37079	14.6406
2020	9.10756	0.716403	4.15294	18.3687
2020	9.73431	0.780827	5.44422	19.6271
2020	8.20727	0.606011	3.33231	16.5134
2020	8.42027	0.572352	3.47269	16.9638
2020	9.99163	0.775061	5.47768	20.0845
2020	8.67768	0.71087	4.18063	17.4921
2020	5.73072	0.537834	2.11038	11.6168
2020	7.76057	0.741467	4.06024	15.6878
2020	8.27892	0.649561	3.66027	16.6935
2020	5.71015	0.470202	1.69073	11.5333
2020	6.17236	0.587548	2.35012	12.5101
2020	7.26683	0.572528	2.82877	14.6833
2020	10.1886	0.739993	4.87008	20.5107
2020	9.5881	0.759776	4.88568	19.2974
2020	11.105	0.77519	5.86292	22.3654
2020	6.44759	0.675881	2.85998	13.1102
2020	7.88423	0.601314	3.18251	15.8836
2020	8.40681	0.719872	4.13991	16.9631
2020	6.27438	0.71054	3.05071	12.7607
2020	8.34744	0.66953	3.85896	16.8311
2020	8.63456	0.560265	3.32963	17.3536
2020	7.29514	0.620864	2.89446	14.698
2020	6.27048	0.65534	2.71504	12.7143
2020	8.99241	0.72851	4.6318	18.127
2020	9.77411	0.67697	4.88767	19.6812
2020	8.58618	0.615122	3.72005	17.2772
2020	9.94866	0.694542	4.78098	20.0512
2020	7.41707	0.530232	2.45752	14.9473
2020	8.9415	0.742163	4.59972	18.0479
2020	4.75308	0.609845	1.92015	9.72581
2020	7.64024	0.530216	2.77615	15.4179
2020	6.701	0.61944	2.89631	13.5663
2020	6.23483	0.560997	2.41636	12.5821
2020	5.3216	0.564945	2.04158	10.8073
2020	7.30926	0.669411	3.31687	14.7681
2020	5.59447	0.687134	2.54952	11.4344
2020	9.0165	0.630228	3.91989	18.1174
2020	9.92911	0.630203	4.46925	19.9215
2020	9.30066	0.679143	4.05978	18.7164
2020	5.30296	0.625764	2.10415	10.8848
2020	7.29118	0.690101	3.39143	14.736
2020	6.58833	0.638219	2.89811	13.3484
2020	6.26411	0.600571	2.56231	12.7188
2020	6.85269	0.532357	2.56245	13.8339
2020	8.04325	0.538653	3.15109	16.2213
2020	5.78498	0.671716	2.64549	11.7998
2020	7.85962	0.628349	3.31739	15.8356
2020	9.15934	0.639202	3.76606	18.4317
2020	8.45356	0.709669	4.14672	17.0301
2020	8.94002	0.684489	4.18534	17.9792
2020	6.63185	0.643425	2.94523	13.4156
2020	6.55903	0.630137	2.76903	13.2488
2020	6.85796	0.539522	2.46869	13.8515
2020	8.86957	0.696553	4.07105	17.8135
2020	8.13226	0.557298	3.17555	16.3582
2020	4.66556	0.71185	2.12842	9.63782
2020	5.49097	0.595187	2.25446	11.1904
2020	6.10087	0.504284	2.13446	12.3247
2020	6.79395	0.518557	2.32042	13.6975
2020	7.24417	0.585171	2.86087	14.5958
2020	9.11997	0.636913	3.88768	18.4151
2020	7.17106	0.679092	3.09139	14.5222
2020	5.9257	0.698993	2.67443	12.0253
2020	7.90828	0.736368	3.89847	16.0068
2020	5.56333	0.67416	2.40678	11.3078
2020	6.65093	0.583388	2.61397	13.4252
2020	8.1672	0.560846	2.91795	16.4546
2020	6.18314	0.602369	2.47377	12.5208
2020	3.62382	0.479242	1.19651	7.46227
2020	5.42201	0.568427	2.08118	11.0328
2020	6.69287	0.608702	2.66379	13.5444
2020	6.43183	0.599921	2.74631	13.0137
2020	6.30346	0.58036	2.46492	12.753
2020	6.32252	0.548575	2.38302	12.7788
2020	5.58517	0.435698	1.52968	11.2573
2020	8.68657	0.572716	3.24131	17.4668
2020	7.85574	0.508514	2.68448	15.7889
2020	6.6109	0.577923	2.58131	13.3455
2020	6.01142	0.524304	2.10556	12.141
2020	6.18175	0.4959	2.05802	12.4948
2020	7.41633	0.549612	2.71982	14.9684
2020	5.8322	0.536988	2.20692	11.8144
2020	6.18633	0.596112	2.61672	12.5646
2020	6.70669	0.71608	3.3224	13.629
2020	5.34794	0.630226	2.23215	10.9148
2020	7.05908	0.579566	2.72946	14.2389
2020	5.67802	0.646955	2.40678	11.5375
2020	5.5745	0.622099	2.26892	11.3567
2020	6.91518	0.581817	2.72111	13.9703
2020	6.84581	0.637983	2.99888	13.8238
2020	5.76225	0.649931	2.49944	11.7517
2020	5.24409	0.593057	2.13817	10.6652
2020	5.85063	0.632015	2.53957	11.9015
2020	8.03796	0.566427	2.87189	16.2004
2020	5.87138	0.566594	2.16456	11.883
2020	4.95249	0.589297	1.94385	10.0839
2020	4.46122	0.522371	1.55562	9.08905
2020	5.29247	0.636241	2.18364	10.7672
2020	4.52786	0.481951	1.46021	9.20095
2020	5.63476	0.622681	2.44444	11.4437
2020	4.58754	0.580923	1.70556	9.37987
2020	3.8822	0.531129	1.33882	7.99054
2020	5.00902	0.619285	1.97066	10.2342
2020	4.76146	0.567641	1.82457	9.75649
2020	6.57474	0.598412	2.62927	13.2766
